# Supplementary material
Source: PubMed Central journal article supplement (PMC3181400)

# Supplement Fig 1

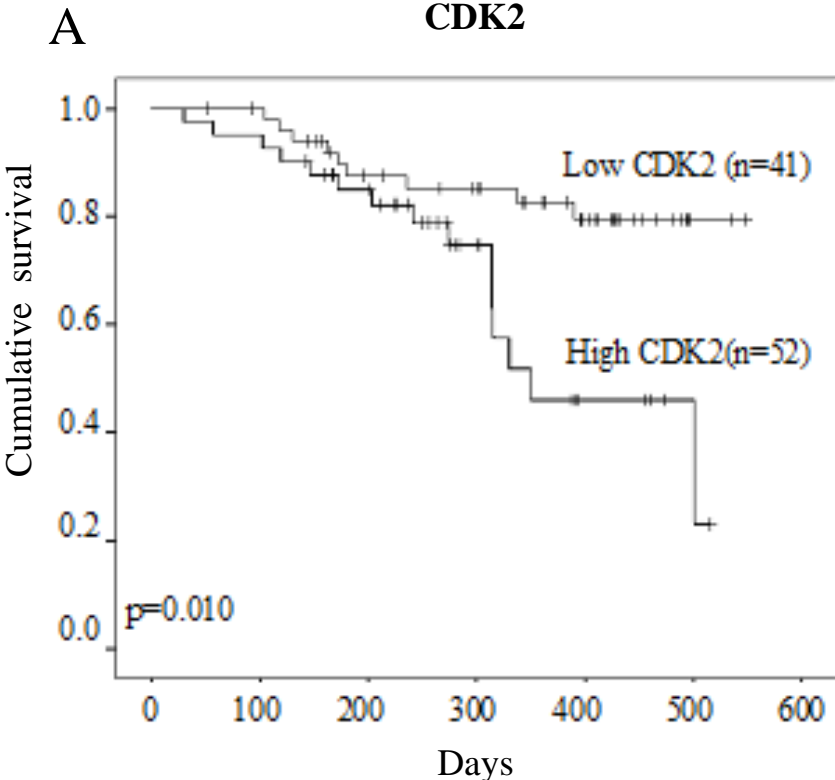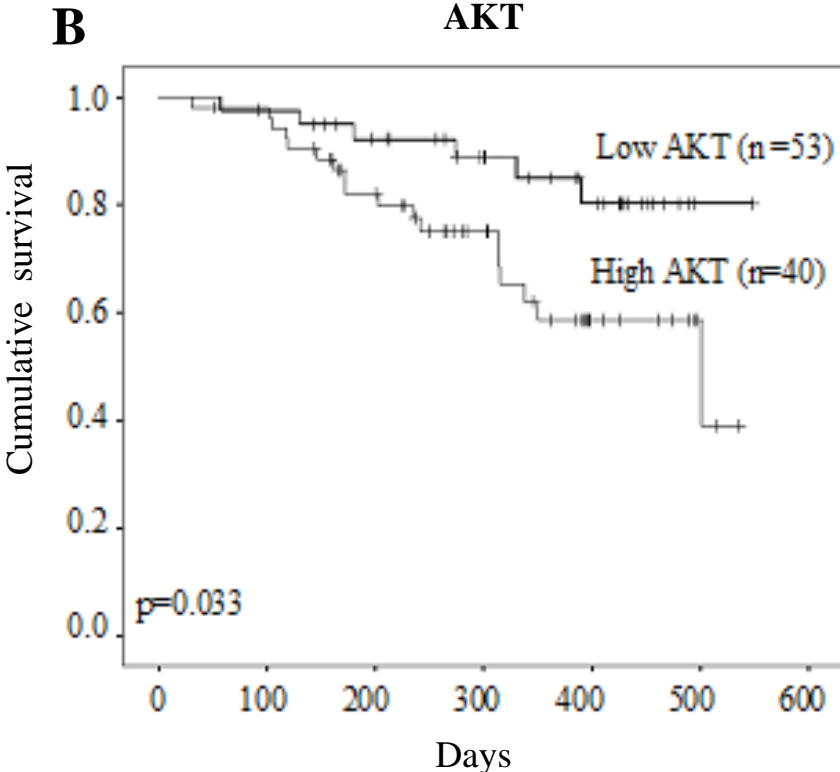

Supplement: mmc1.pdf [file mmc1.pdf]
